# Supplementary material
Source: publisher figshare collection journal article supplement (https://diabetesjournals.figshare.com/articles/dataset/_/18092744)
Supplement: Supplementary file 1 [file 1]

```

1 #Additional analysis scripts for the manuscript: "Gut microbiome composition is
  predictive of incident type 2 diabetes in a population cohort of 5 572 Finnish adults"
  by Ruuskanen & Erawijantari et al.
2 #In this analysis code, participants with type 2 diabetes diagnosis within two years
  from baseline have been removed from the data
3 #Due to sensitive health information, the data in this study are available based on a
  written application to the THL Biobank as instructed in:
  https://thl.fi/en/web/thl-biobank/for-researchers
4
5 if (!requireNamespace("BiocManager")) {
6   install.packages("BiocManager")
7 }
8
9 #Use development version of ComplexHeatmap, 2.7.11<
10 #library(devtools)
11 #install_github("jokergoo/ComplexHeatmap")
12 #devtools::install_github("slowkow/ggrepel")
13
14 packages <- c("ggplot2", "biomformat", "ggthemes", "phyloseq", "vegan", "uwot",
  "patchwork", "microbiome", "tidyverse", "reshape2", "survival", "magrittr", "ggnewscale",
  "propr", "ComplexHeatmap", "maptree", "RColorBrewer", "rms", "viridis", "scales",
  "data.table")
15
16
17 is_installed <- function(pkg) {
18   new.pkg <- pkg[!(pkg %in% installed.packages()[, "Package"])]
19   if (length(new.pkg)) {
20     BiocManager::install(new.pkg, ask=F)
21   }
22   sapply(pkg, require, character.only = TRUE)
23 }
24 is_installed(packages)
25
26 wideScreen <- function(howWide=Sys.getenv("COLUMNS")) {
27   options(width=as.integer(howWide))
28 }
29 wideScreen()
30
31 theme_set(theme_tufte(base_family = "sans", base_size = 18) + theme(panel.border =
  element_rect(colour = "black", fill = NA), axis.text = element_text(colour = "black",
  size = 18)))
32
33
34 #All data are included in the THL Biobank release package.
35 #Phenotype data is loaded from the included R object
36 load("FR_02_phenotype_data.RData")
37 #Subset to data which includes the fecal samples
38 FR02 <- FR02[!is.na(FR02$Barcode),]
39 row.names(FR02) <- FR02$Barcode
40 #Construct objects with NCBI data from SHOGUN
41 if (file.exists("microbiome_predicts_incident_T2D/2y_exclusion_analysis/ncbi_data.RDs"))
  {
42   ncbi_data <- readRDS(
43     "microbiome_predicts_incident_T2D/2y_exclusion_analysis/ncbi_data.RDs")
44 } else {
45   #Construct the primary phyloseq object and subset to FR02 samples.
46   ncbi_data <- biomformat::read_biom(
47     "microbiome_predicts_incident_T2D/combined_redist.species.biom") #BIOM table from the
48     SHOGUN species-level output
49   ncbi_data <- biomformat::biom_data(ncbi_data)
50   ncbi_tax_table <- strsplit(row.names(as.matrix(ncbi_data)), ";")
51   ncbi_tax_table <- matrix(unlist(ncbi_tax_table), nrow=length(ncbi_tax_table), byrow=T)
52   row.names(ncbi_data) <- row.names(ncbi_tax_table)
53   ncbi_data <- phyloseq(otu_table(as.matrix(ncbi_data), taxa_are_rows=T), tax_table(
54     ncbi_tax_table))
55   #Format the tax table.
56   colnames(tax_table(ncbi_data)) <- c("Domain", "Phylum", "Class", "Order", "Family",
57     "Genus", "Species")
58   #Combine the phenotype data with the taxa data

```

```

54 ncbi_data <- phyloseq(otu_table(ncbi_data), tax_table(ncbi_data), sample_data(FR02))
55 #remove samples with less than 50k reads (total)
56 to_be_pruned <- sample_sums(ncbi_data) > 50000
57 ncbi_data <- prune_samples(to_be_pruned, ncbi_data)
58 #remove pregnant (GRAVID==2) participants
59 ncbi_data <- subset_samples(ncbi_data, GRAVID %in% c(1, NA))
60 #remove participants who have used antibiotics in the last 6 months (BL_USE_RX_J01==1)
61 ncbi_data <- subset_samples(ncbi_data, BL_USE_RX_J01 %in% c(0, NA))
62 #remove participants with prevalent diabetes (PREVAL_DIAB==1)
63 ncbi_data <- subset_samples(ncbi_data, PREVAL_DIAB==0)
64 #remove participants with diabetes indicator values over set guidelines:
FR02_GLUK_NOLLA >= 7, FR02_GLUK_120 >= 11.1 & HBA1C >= 48 (ignore NA values)
65 ncbi_data <- subset_samples(ncbi_data, FR02_GLUK_NOLLA<7 | is.na(FR02_GLUK_NOLLA))
66 ncbi_data <- subset_samples(ncbi_data, FR02_GLUK_120<11.1 | is.na(FR02_GLUK_120))
67 ncbi_data <- subset_samples(ncbi_data, HBA1C<48 | is.na(HBA1C))
68 #remove participants with type 2 diabetes diagnosis within two years from baseline
69 ncbi_data <- subset_samples(ncbi_data, DIAB_T2_AGEDIFF > 2)
70 #save the final objects
71 saveRDS(ncbi_data,
"microbiome_predicts_incident_T2D/2y_exclusion_analysis/ncbi_data.RDs")
72 }
73
74
75 #Functions
76 prediab_cat <- function(pseq){
77   data <- sample_data(pseq)
78   prediab <- ifelse(data$FR02_GLUK_NOLLA >= 5.6 & data$FR02_GLUK_NOLLA < 6.9 | data$
FR02_GLUK_120 >= 7.8 & data$FR02_GLUK_120 < 11 | data$HBA1C >= 39 & data$HBA1C < 47
, 1, 0)
79   prediab <- as.factor(prediab)
80   return(prediab)
81 }
82
83 cox_wrapper <- function(data,
84                           predictors,
85                           covariates,
86                           status,
87                           time_to_event,
88                           alpha_level,
89                           normalize,
90                           test_ph_assumption) {
91   if(normalize) {
92     if(class(data[, predictors]) == "numeric") {
93       x <- data[, predictors]
94       data[, predictors] <- (x - mean(x, na.rm = T))/sd(x, na.rm = T)
95     } else {
96       data[, predictors] <- apply(data[, predictors], 2, FUN = function(x) {(x - mean(x
, na.rm = T))/sd(x, na.rm = T) })
97     }
98   }
99   ## Formulas *****
100   linear_formulas <- lapply(predictors, function(x) {
101     formula_data <- deparse(substitute(data))
102     formula <- paste0("Surv(", formula_data, "$", time_to_event, ", ", formula_data, "$",
status, ") ~ ", paste(covariates, collapse = "+"), " + ", x)
103     return(formula)
104   }) %>%
105     set_names(predictors)
106   ## Cox regression *****
107   print("Cox")
108   linear_cox_fit <- lapply(linear_formulas, function(x) {
109     coxph(as.formula(x), data=data, x=TRUE)
110   })
111   ## Check PH assumptions *****
112   if(test_ph_assumption) {
113     print("PH assumptions")
114     ph_assumption <- lapply(predictors, function(m) {
115       west <- cox.zph(linear_cox_fit[[m]])
116       p_values <- west$table[, "p"]

```

```

117     # significant cases
118     x <- which(p_values < 1)
119     if(length(x) == 0) {
120         return(NULL)
121     }
122     df <- data.frame(feature = m, variable_not_ph = names(x), p_value = p_values[x])
123 }) %>%
124     do.call(rbind, .) %>%
125     mutate(p_adj = p.adjust(p_value, "BH")) %>%
126     filter(p_value < alpha_level)
127 }
128 ## Results *****
129 print("Results")
130 results <- lapply(predictors, function(x) {
131     df <- summary(linear_cox_fit[[x]])$coefficients %>% as.data.frame()
132     df <- df[nrow(df), ] %>%
133     select(coef, "se(coef)", "z", "Pr(>|z|)") %>%
134     set_colnames(c("coef", "se_coef", "west_stat_value", "p")) %>%
135     mutate(west_stat = "Wald")
136     df <- df %>%
137     mutate(predictor = x)
138 }) %>%
139     do.call(rbind, .)
140 # Multiple westing correction
141 results <- results %>%
142     mutate(P_adjusted = p.adjust(p, "BH")) %>%
143     ungroup() %>%
144     group_by(predictor)
145 # Results in neat form for presentation
146 neat_results <- results %>%
147     # filter(p == min(p)) %>%
148     ungroup() %>%
149     mutate(HR = round(exp(coef), 3)) %>%
150     mutate(HR_lower_95 = round(exp(coef - 1.96*se_coef), 3),
151           HR_upper_95 = round(exp(coef + 1.96*se_coef), 3),
152           P = round(p, 5),
153           Coefficient = round(coef, 3),
154           "Coefficient SE" = round(se_coef, 3)) %>%
155     mutate(HR = paste0(HR, " (95% CI, ", HR_lower_95, "-", HR_upper_95, ")")) %>%
156     select(Predictor = predictor, Coefficient, "Coefficient SE", HR, "p", "P_adjusted",
157           "west_stat_value", "west_stat") %>%
158     mutate(HR = ifelse(is.na(Coefficient), NA, HR)) %>%
159     filter(P_adjusted < alpha_level) %>%
160     arrange(P_adjusted) %>%
161     set_colnames(c("Predictor", "Coefficient", "Coefficient SE", "HR", "P-value", "P
162                   (adjusted)", "west Statistic Value", "west Statistic"))
163 # Results in a form more convenient for further manipulations
164 results <- results %>%
165     ungroup %>%
166     mutate(PH = exp(coef)) %>%
167     mutate(p_adj = P_adjusted) %>%
168     mutate(direction = ifelse(coef < 0, "negative", "positive"))
169 if(nrow(neat_results) == 0) {
170     return(list(results = results))
171 }
172 if(test_ph_assumption) {
173     if(nrow(neat_results) == 0) {
174         return(list(results = results, ph_assumption = ph_assumption))
175     }
176     return(list(neat_results = neat_results,
177               results = results,
178               ph_assumption = ph_assumption))
179 }
180 return(list(neat_results = neat_results, results = results))
181 }
182 #preprocess data
183 if (file.exists(
184     "microbiome_predicts_incident_T2D/2y_exclusion_analysis/ncbi_data_raw_east.RDs") &&

```

```

file.exists(
"microbiome_predicts_incident_T2D/2y_exclusion_analysis/ncbi_data_raw_west.RDs") &&
183 file.exists("microbiome_predicts_incident_T2D/2y_exclusion_analysis/ncbi_data_main.RDs")
  && file.exists("microbiome_predicts_incident_T2D/2y_exclusion_analysis/ncbi_pca.RDs")
  &&
184 file.exists("microbiome_predicts_incident_T2D/2y_exclusion_analysis/ncbi_data_east.RDs")
  && file.exists(
"microbiome_predicts_incident_T2D/2y_exclusion_analysis/ncbi_pca_east.RDs") &&
185 file.exists("microbiome_predicts_incident_T2D/2y_exclusion_analysis/ncbi_data_west.RDs")
  && file.exists(
"microbiome_predicts_incident_T2D/2y_exclusion_analysis/ncbi_pca_west.RDs") &&
186 file.exists(
"microbiome_predicts_incident_T2D/2y_exclusion_analysis/ncbi_pca_data_east.RDs") &&
file.exists(
"microbiome_predicts_incident_T2D/2y_exclusion_analysis/ncbi_pca_data_west.RDs")) {
187   ncbi_data_raw_east <- readRDS(
    "microbiome_predicts_incident_T2D/2y_exclusion_analysis/ncbi_data_raw_east.RDs")
188   ncbi_data_raw_west <- readRDS(
    "microbiome_predicts_incident_T2D/2y_exclusion_analysis/ncbi_data_raw_west.RDs")
189   ncbi_data_main <- readRDS(
    "microbiome_predicts_incident_T2D/2y_exclusion_analysis/ncbi_data_main.RDs")
190   ncbi_data_east <- readRDS(
    "microbiome_predicts_incident_T2D/2y_exclusion_analysis/ncbi_data_east.RDs")
191   ncbi_data_west <- readRDS(
    "microbiome_predicts_incident_T2D/2y_exclusion_analysis/ncbi_data_west.RDs")
192   ncbi_pca <- readRDS(
    "microbiome_predicts_incident_T2D/2y_exclusion_analysis/ncbi_pca.RDs")
193   ncbi_pca_east <- readRDS(
    "microbiome_predicts_incident_T2D/2y_exclusion_analysis/ncbi_pca_east.RDs")
194   ncbi_pca_west <- readRDS(
    "microbiome_predicts_incident_T2D/2y_exclusion_analysis/ncbi_pca_west.RDs")
195   ncbi_pca_data_east <- readRDS(
    "microbiome_predicts_incident_T2D/2y_exclusion_analysis/ncbi_pca_data_east.RDs")
196   ncbi_pca_data_west <- readRDS(
    "microbiome_predicts_incident_T2D/2y_exclusion_analysis/ncbi_pca_data_west.RDs")
197 } else {
198   #Limit taxa to core in the east (EAST) set
199   core_ncbi_taxa <- core(prune_samples(meta(ncbi_data)$EAST == 1, ncbi_data) %>%
    transform("compositional", detection = .1/100, prevalence = 1/10) %>% taxa_names())
200   ncbi_data_main <- prune_taxa(core_ncbi_taxa, ncbi_data)
201   #divide non-transformed data to east/west (EAST/WEST) sets
202   ncbi_data_raw_east <- prune_samples(meta(ncbi_data_main)$EAST == 1, ncbi_data_main)
203   ncbi_data_raw_west <- prune_samples(meta(ncbi_data_main)$EAST == 0, ncbi_data_main)
204   #CLR-transform raw counts
205   ncbi_data_main <- transform(ncbi_data_main, "clr")
206   #calculate additional variables
207   PREDIAB <- prediab_cat(ncbi_data_main)
208   NON_HDL <- sample_data(ncbi_data)$KOL - sample_data(ncbi_data)$HDL
209   #calculate diversity
210   ncbi_diversity <- estimate_richness(ncbi_data, measures = c("Observed", "Shannon"))
211   #reduce metadata to useful columns
212   useful_variables <- c("BL_AGE", "BMI", "MEN", "SYSTEM", "CURR_SMOKE", "TRIG",
    "INCIDENT_DIAB_T2", "DIAB_T2_AGEDIFF", "EAST")
213   sample_data(ncbi_data_main) <- sample_data(ncbi_data_main)[,sample_variables(
    ncbi_data_main) %in% useful_variables]
214   #separate transformed and curated data to east/west (EAST/WEST) sets
215   ncbi_data_east <- prune_samples(meta(ncbi_data_main)$EAST == 1, ncbi_data_main)
216   ncbi_data_west <- prune_samples(meta(ncbi_data_main)$EAST == 0, ncbi_data_main)
217   #calculate 10 first PCAs with full community
218   ncbi_data_raw_clr <- transform(ncbi_data, "clr")
219   ncbi_pca <- ordinate(ncbi_data_raw_clr, "RDA")
220   ncbi_pca_data <- as.data.frame(scores(ncbi_pca, choices = c(1:10))$sites)
221   ncbi_pca_east <- ordinate(prune_samples(meta(ncbi_data_raw_clr)$EAST == 1,
    ncbi_data_raw_clr), "RDA")
222   ncbi_pca_data_east <- as.data.frame(scores(ncbi_pca_east, choices = c(1:10))$sites)
223   ncbi_pca_west <- ordinate(prune_samples(meta(ncbi_data_raw_clr)$EAST == 0,
    ncbi_data_raw_clr), "RDA")
224   ncbi_pca_data_west <- as.data.frame(scores(ncbi_pca_west, choices = c(1:10))$sites)
225   #combine with additional data

```

```

226 sample_data(ncbi_data_main) <- cbind(sample_data(ncbi_data_main), PREDIAB, NON_HDL,
ncbi_diversity, ncbi_pca_data)
227 sample_data(ncbi_data_east) <- cbind(sample_data(ncbi_data_east), PREDIAB = PREDIAB[
which(meta(ncbi_data_main)$EAST == 1)], NON_HDL = NON_HDL[which(meta(ncbi_data_main)$
EAST == 1)], ncbi_diversity[which(meta(ncbi_data_main)$EAST == 1)],,
ncbi_pca_data_east)
228 sample_data(ncbi_data_west) <- cbind(sample_data(ncbi_data_west), PREDIAB = PREDIAB[
which(meta(ncbi_data_main)$EAST == 0)], NON_HDL = NON_HDL[which(meta(ncbi_data_main)$
EAST == 0)], ncbi_diversity[which(meta(ncbi_data_main)$EAST == 0)],,
ncbi_pca_data_west)
229 saveRDS(ncbi_data_raw_east,
"microbiome_predicts_incident_T2D/2y_exclusion_analysis/ncbi_data_raw_east.RDs")
230 saveRDS(ncbi_data_raw_west,
"microbiome_predicts_incident_T2D/2y_exclusion_analysis/ncbi_data_raw_west.RDs")
231 saveRDS(ncbi_data_main,
"microbiome_predicts_incident_T2D/2y_exclusion_analysis/ncbi_data_main.RDs")
232 saveRDS(ncbi_data_east,
"microbiome_predicts_incident_T2D/2y_exclusion_analysis/ncbi_data_east.RDs")
233 saveRDS(ncbi_data_west,
"microbiome_predicts_incident_T2D/2y_exclusion_analysis/ncbi_data_west.RDs")
234 saveRDS(ncbi_pca,
"microbiome_predicts_incident_T2D/2y_exclusion_analysis/ncbi_pca.RDs")
235 saveRDS(ncbi_pca_east,
"microbiome_predicts_incident_T2D/2y_exclusion_analysis/ncbi_pca_east.RDs")
236 saveRDS(ncbi_pca_west,
"microbiome_predicts_incident_T2D/2y_exclusion_analysis/ncbi_pca_west.RDs")
237 saveRDS(ncbi_pca_data_east,
"microbiome_predicts_incident_T2D/2y_exclusion_analysis/ncbi_pca_data_east.RDs")
238 saveRDS(ncbi_pca_data_west,
"microbiome_predicts_incident_T2D/2y_exclusion_analysis/ncbi_pca_data_west.RDs")
239 }
240
241 #Filter features based on corrected p-values in the east dataset
242 #set variables
243 alpha_level <- 0.05 #to filter
244 status <- "INCIDENT_DIAB_T2"
245 time_to_event <- "DIAB_T2_AGEDIFF"
246 ncbi_cox_data_east <- cbind(meta(ncbi_data_east), as.matrix(t(otu_table(ncbi_data_east
))))
247 predictors <- c("Shannon", "Observed", colnames(ncbi_pca_data_east), taxa_names(
ncbi_data_east))
248 covariates <- c("BL_AGE", "BMI", "MEN", "SYSTEM", "NON_HDL", "CURR_SMOKE", "TRIG")
249 splines <- TRUE
250 normalize <- TRUE
251 test_ph_assumption <- FALSE
252 #Cox regression with previously defined function
253 set.seed(11235)
254 ncbi_cox_east <- cox_wrapper(data = ncbi_cox_data_east,
255                             predictors = predictors,
256                             covariates = covariates,
257                             alpha_level = alpha_level,
258                             status = status,
259                             time_to_event = time_to_event,
260                             normalize = normalize,
261                             test_ph_assumption = test_ph_assumption)
262
263 ncbi_cox_results_east <- merge(ncbi_cox_east$neat_results, as.data.frame(ncbi_data_east@
tax_table@.Data), by.x="Predictor", by.y="row.names")
264 ncbi_cox_results_east <- ncbi_cox_results_east[order(-ncbi_cox_results_east$Coefficient)
,]
265 ncbi_cox_results_east$Species <- gsub("s_", "", ncbi_cox_results_east$Species)
266 ncbi_cox_results_east$Species <- gsub("_", " ", ncbi_cox_results_east$Species)
267 ncbi_cox_results_east$Family <- gsub("f_", "", ncbi_cox_results_east$Family)
268
269 #Correlations and clustering between the associated taxa in east data
270 otu_table_assoc_taxa <- as.data.frame(otu_table(prune_taxa(ncbi_cox_east$neat_results$
Predictor, ncbi_data_raw_east)))
271 rownames(otu_table_assoc_taxa) <- ncbi_cox_results_east$Species[match(rownames(
otu_table_assoc_taxa), ncbi_cox_results_east$Predictor)]

```

```

272 set.seed(11235)
273 proprmatrix <- propr(t(otu_table_assoc_taxa), metric = "rho", p = 100)
274 clusters_assoc <- hclust(dist(proprmatrix@matrix), method = "ward.D2")
275 #Compute the Kelley-Gardner-Sutcliffe penalty function for a hierarchical cluster tree,
to determine optimal number of clusters
276 op_k <- kgs(clusters_assoc, dist(proprmatrix@matrix), maxclus = 20)
277 op_k <- as.numeric(names(op_k[which(op_k == min(op_k))]))
278 cluster_ids <- cutree(tree = clusters_assoc, k = op_k)
279 svg("microbiome_predicts_incident_T2D/2y_exclusion_analysis/clusters.svg", width=10,
height=10)
280 plot(clusters_assoc)
281 rect.hclust(clusters_assoc, k = op_k, border = 2:7)
282 dev.off()
283
284 heatmap_annotation <- data.frame(Species = rownames(proprmatrix@matrix), Cluster =
cluster_ids)
285 heatmap_annotation$Predictor <- ncbi_cox_results_east$Predictor[match(heatmap_annotation
$Species, ncbi_cox_results_east$Species)]
286
287 #Clustering correlating significant taxa for east and west data
288 #Combine read counts of clusters and calculate their CLR values
289 taxa_clusters <- merge(heatmap_annotation[c("Cluster")], ncbi_cox_results_east[c(
"Species", "Predictor")], by.x = "row.names", by.y = "Species")
290 taxa_clusters$Cluster <- factor(taxa_clusters$Cluster, levels = 1:length(unique(
taxa_clusters$Cluster)))
291
292 cluster_phylo_east <- ncbi_data_raw_east
293 cluster_phylo_west <- ncbi_data_raw_west
294 index_taxa <- c()
295 for (cluster in levels(taxa_clusters$Cluster)) {
296 taxa_to_merge <- taxa_clusters$Predictor[which(taxa_clusters$Cluster == cluster)]
297 cluster_phylo_east <- merge_taxa(cluster_phylo_east, taxa_to_merge, archetype=1)
298 cluster_phylo_west <- merge_taxa(cluster_phylo_west, taxa_to_merge, archetype=1)
299 index_taxa[cluster] <- taxa_to_merge[1]
300 }
301 cluster_phylo_east <- transform(cluster_phylo_east, "clr")
302 cluster_phylo_west <- transform(cluster_phylo_west, "clr")
303 #Retain only clusters
304 cluster_phylo_east <- prune_taxa(index_taxa, cluster_phylo_east)
305 cluster_phylo_west <- prune_taxa(index_taxa, cluster_phylo_west)
306 taxa_names(cluster_phylo_east) <- paste0("Cluster_", taxa_clusters$Cluster[match(
taxa_names(cluster_phylo_east), taxa_clusters$Predictor)])
307 taxa_names(cluster_phylo_west) <- paste0("Cluster_", taxa_clusters$Cluster[match(
taxa_names(cluster_phylo_west), taxa_clusters$Predictor)])
308
309 #test the individual taxa and clusters in the east data
310 #set variables
311 alpha_level <- 1 #to include everything in the results
312 status <- "INCIDENT_DIAB_T2"
313 time_to_event <- "DIAB_T2_AGEDIFF"
314 ncbi_cox_data_east_2 <- cbind(meta(ncbi_data_east), as.matrix(t(otu_table(ncbi_data_east
))), as.matrix(t(otu_table(cluster_phylo_east))))
315 predictors <- c(ncbi_cox_results_east$Predictor, taxa_names(cluster_phylo_east), "PC1")
316 covariates <- c("BL_AGE", "BMI", "MEN", "SYSTEM", "NON_HDL", "CURR_SMOKE", "TRIG")
317 splines <- TRUE
318 normalize <- TRUE
319 test_ph_assumption <- FALSE
320 #Cox regression with previously defined function
321 set.seed(11235)
322 ncbi_cox_east_2 <- cox_wrapper(data = ncbi_cox_data_east_2,
323                               predictors = predictors,
324                               covariates = covariates,
325                               alpha_level = alpha_level,
326                               status = status,
327                               time_to_event = time_to_event,
328                               normalize = normalize,
329                               test_ph_assumption = test_ph_assumption)
330
331 ncbi_cox_results_east_2 <- data.frame(ncbi_cox_east_2$neat_results)

```



```

332 ncbi_cox_results_east_2 <- merge(ncbi_cox_results_east_2[c("Predictor", "Coefficient",
"HR", "P.value")], ncbi_cox_results_east[c("Predictor", "Family", "Species")], by =
"Predictor", all = TRUE)
333 ncbi_cox_results_east_2 <- ncbi_cox_results_east_2[order(-ncbi_cox_results_east_2$
Coefficient),]
334 ncbi_cox_results_east_2$Set <- "East"
335
336 #test the individual taxa and clusters in the west data
337 #use same variables as for previous model run (thus not repeated here)
338 ncbi_cox_data_west <- cbind(meta(ncbi_data_west), as.matrix(t(otu_table(ncbi_data_west
))), as.matrix(t(otu_table(cluster_phylo_west))))
339 #Cox regression with previously defined function
340 set.seed(11235)
341 ncbi_cox_west <- cox_wrapper(data = ncbi_cox_data_west,
342                             predictors = predictors,
343                             covariates = covariates,
344                             alpha_level = alpha_level,
345                             status = status,
346                             time_to_event = time_to_event,
347                             normalize = normalize,
348                             test_ph_assumption = test_ph_assumption)
349
350 ncbi_cox_results_west <- data.frame(ncbi_cox_west$neat_results)
351 ncbi_cox_results_west <- merge(ncbi_cox_results_west[c("Predictor", "Coefficient", "HR"
, "P.value")], ncbi_cox_results_east[c("Predictor", "Family", "Species")], by =
"Predictor", all = TRUE)
352 ncbi_cox_results_west <- ncbi_cox_results_west[order(-ncbi_cox_results_west$Coefficient)
,]
353 ncbi_cox_results_west$Set <- "West"
354
355 #save results
356 results_out_east <- rbind(data.frame(ncbi_cox_east$neat_results), data.frame(
ncbi_cox_east_2$neat_results[which(grepl("Cluster", ncbi_cox_east_2$neat_results$
Predictor)),]))
357 results_out_west <- data.frame(ncbi_cox_west$neat_results)
358 results_out_east <- merge(results_out_east[c("Predictor", "Coefficient", "HR", "P.value"
, "P..adjusted.")], as.data.frame(ncbi_data_east@tax_table@.Data)["Species"], by.x=
"Predictor", by.y="row.names", all.x = TRUE)
359 results_out_west <- merge(results_out_west[c("Predictor", "Coefficient", "HR", "P.value"
, "P..adjusted.")], as.data.frame(ncbi_data_west@tax_table@.Data)["Species"], by.x=
"Predictor", by.y="row.names", all.x = TRUE)
360 results_out_west$P..adjusted. <- NA
361 results_out_east[which(grepl("Cluster", results_out_east$Predictor)),]$P..adjusted. <- NA
362 results_out <- merge(results_out_east, results_out_west, by="Predictor", suffixes=c(
".east", ".west"))
363 result_order <- results_out[rev(order(results_out$Coefficient.east)),]$Predictor
364 result_order <- c("PC1", paste0("Cluster_", 1:6), result_order[which(grepl("sp",
result_order))])
365 results_out <- results_out[match(result_order, results_out$Predictor),]
366 results_out[-which(is.na(results_out$Species.east)), "Predictor"] <- as.character(
results_out[-which(is.na(results_out$Species.east)), "Species.east"])
367 results_out$Predictor <- gsub("_s_", "", results_out$Predictor)
368 results_out$Predictor <- gsub("_", ".", results_out$Predictor)
369 names(results_out) <- gsub("\\.\\.\\.", ".", names(results_out))
370 results_out <- results_out[,!names(results_out) %in% c("Species.east", "Species.west",
"P.adjusted.west")]
371 results_out[c("P.value.east", "P.adjusted.east", "P.value.west")] <- lapply(results_out[
c("P.value.east", "P.adjusted.east", "P.value.west")], function(x) round(x, 4))
372 write.csv(results_out,
"microbiome_predicts_incident_T2D/2y_exclusion_analysis/Table_S2.csv", row.names=F)
373
374 #plot heatmap of taxa associations, clustering, and hazard ratios in the east data
375 newnames <- lapply(rownames(proprmatrix(matrix), function(x) bquote(italic(. (x)))))
376 heatmap_annotation$HR <- gsub("[0-9]\\.[0-9]*[[:space:]].*", "\\1",
ncbi_cox_results_east$HR[match(heatmap_annotation$Predictor, ncbi_cox_results_east$
Predictor)])
377 heatmap_annotation$HR <- round(as.numeric(as.character(heatmap_annotation$HR)), 1)
378 heatmap_annotation$HR <- factor(heatmap_annotation$HR, levels = rev(seq(0.8, 1.2, 0.1)))
379

```

```

380 ann_colors <- list(HR = brewer.pal(n = 5, name = "BrBG"), Cluster = brewer.pal(n = 12,
name = "Paired"))[-seq(0,12,2)]
381 names(ann_colors$HR) <- levels(heatmap_annotation$HR)
382 names(ann_colors$Cluster) <- c("1", "2", "3", "4", "6", "5")
383 ann_colors$Cluster <- factor(ann_colors$Cluster, levels = ann_colors$Cluster[c(4,2,6,5,3
,1)])
384 heatmap_colors <- rev(brewer.pal(n = 10, name = "RdBu"))
385 heatmap_colors[c(5,6)] <- "#FFFFFF"
386 svg("microbiome_predicts_incident_T2D/2y_exclusion_analysis/correlations.svg", width=15
, height=15)
387 pheatmap(proprmatrix@matrix, labels_row = as.expression(newnames), labels_col =
as.expression(newnames), annotation_row = heatmap_annotation[4], treeheight_row = 0,
annotation_col = heatmap_annotation[2], annotation_colors = ann_colors, cutree_rows =
op_k, cutree_cols = op_k, clustering_method = "ward.D2", color = heatmap_colors, breaks
= seq(-1, 1, length.out = 11), legend_breaks = seq(-1, 1, length.out = 11), cellwidth=10
, cellheight=10)
388 dev.off()
389
390 #plot HR of both west and east data
391 ncbi_cox_results <- rbind(ncbi_cox_results_east_2, ncbi_cox_results_west)
392
393 Species <- c()
394 Family <- c()
395 Set <- c()
396 Facet <- c()
397 HR <- c()
398 HR1 <- c()
399 HR2 <- c()
400
401 for (i in 1:length(ncbi_cox_results$Predictor)){
402   Species[[i]] <- ifelse(is.na(ncbi_cox_results$Species[i]), sub("_", " ",
ncbi_cox_results$Predictor[i]), as.character(ncbi_cox_results$Species[i]))
403   Family[[i]] <- ifelse(is.na(ncbi_cox_results$Family[i]), NA, as.character(
ncbi_cox_results$Family[i]))
404   HR[[i]] <- str_split(ncbi_cox_results$HR[i], " ")[[1]][1]
405   HR_range <- str_split(ncbi_cox_results$HR[i], " ")[[1]][4]
406   HR1[[i]] <- str_split(HR_range, "-")[1][1]
407   HR2_bef <- str_split(HR_range, "-")[1][2]
408   HR2[[i]] <- substr(HR2_bef, 1, nchar(HR2_bef)-1)
409   Set[[i]] <- ncbi_cox_results$Set[i]
410   Facet[[i]] <- ifelse(is.na(ncbi_cox_results$Family[i]), "Grouping", "Taxa")
411   HRdf <- data.frame(Species = Species,
412                     Family = Family,
413                     Set = Set,
414                     Facet = Facet,
415                     HR = HR,
416                     HR1 = HR1,
417                     HR2 = HR2)
418 }
419
420 family_color_map <- data.frame(Color = c("chartreuse2", "#7b562e", "#9bb940", "#c5bb9a"
, "darkred", "#ff4ae3", "#339a00", "#d78343", "darkblue", "#5f96d6", "black"),
421   Family = c("Akkermansiaceae", "Bacteroidaceae", "Clostridiaceae", "Eggerthellaceae",
"Eubacteriaceae", "Lachnospiraceae", "Oscillospiraceae", "Rickenellaceae",
"Ruminococcaceae", "Sutterellaceae", NA))
422
423 HRdf$Species <- factor(HRdf$Species, levels = c(paste0("Cluster ", 6:1), "PC1",
as.character(HRdf[which(HRdf$Set %in% "East" & HRdf$Facet %in% "Taxa"),][order(HRdf[
which(HRdf$Set %in% "East" & HRdf$Facet %in% "Taxa"),]$HR),]$Species)))#order features
by effect size in the east data
424 p <- ggplot(data = HRdf, aes(y = Species, x = as.numeric(as.character(HR)), color =
Family)) +
425   geom_pointrange(aes(xmin=as.numeric(as.character(HR1)), xmax=as.numeric(
as.character(HR2))), lwd = 1) +
426   scale_x_continuous(limits = c(0.6, 1.5)) +
427   scale_color_manual(name = "Family", values = as.character(family_color_map$Color))
+
428   guides(color = guide_legend(override.aes = list(size = 1.4))) +
429   xlab("HR") + ylab("Species") +

```



```

430     geom_vline(xintercept=c(1.0), linetype="dotted") +
431     theme(axis.text.y = element_text(face = "italic"), legend.text = element_text(face
      = "italic"), axis.title.y = element_blank()) +
432     facet_grid(Facet~Set, scales = "free")
433
434 ggsave("microbiome_predicts_incident_T2D/2y_exclusion_analysis/HR_comparison.svg", plot=
p, units="in", width=15, height=10)
435
436 #Plot Kaplan-Meier curves
437 kp_predictors <- ncbi_cox_results_west$Predictor[which(ncbi_cox_results_west$P.value <
0.05)]
438 kp_covariates <- covariates
439 kp_time_to_event <- time_to_event
440 kp_status <- status
441 kp_data <- ncbi_cox_data_west[,which(colnames(ncbi_cox_data_west) %in% c(kp_status,
kp_time_to_event, kp_predictors, kp_covariates))]
442 kp_time <- seq(0, max(kp_data$DIAB_T2_AGEDIFF), by = .01)
443 kp_list <- list(NULL)
444 for (time in 1:length(kp_time)) {
445   kp_table <- lapply(kp_predictors, function(x) {
446     return_table <- data.frame(groupkm(kp_data[x], Surv(kp_data$DIAB_T2_AGEDIFF, kp_data
$INCIDENT_DIAB_T2), g=4, u=kp_time[time], pl=FALSE))
447     return_table$Predictor <- x
448     return_table$quantile <- c(1:4)
449     return(return_table)
450   })
451   kp_table <- do.call(rbind, kp_table)
452   kp_table$time <- kp_time[time]
453   kp_list[[time]] <- kp_table
454 }
455
456 kp_list <- do.call(rbind, kp_list)
457 kp_predictors <- recode(kp_predictors, 'sp2673' = "[Clostridium] citroniae", 'sp2671' =
"[Clostridium] bolteae", 'sp2697' = "Tyzzerella nexilis", 'sp2638' = "[Ruminococcus]
gnavus")
458 kp_predictors <- gsub("_", " ", kp_predictors)
459 kp_list$Predictor <- recode(kp_list$Predictor, 'sp2673' = "[Clostridium] citroniae",
'sp2671' = "[Clostridium] bolteae", 'sp2697' = "Tyzzerella nexilis", 'sp2638' =
"[Ruminococcus] gnavus")
460 kp_list$Predictor <- gsub("_", " ", kp_list$Predictor)
461 kp_list$Predictor <- factor(kp_list$Predictor, levels = kp_predictors)
462
463 p <- ggplot(data = kp_list, aes(y = KM, x = time, group = quantile)) +
464   geom_line(aes(color = quantile)) +
465   geom_vline(aes(xintercept = 2), linetype = "dashed", color = "gray") +
466   scale_color_viridis(labels = c("Min to Q1", "Q1 to Q2", "Q2 to Q3", "Q3 to max")) +
467   scale_y_continuous(breaks = pretty_breaks()) +
468   guides(color = guide_legend(override.aes = list(size = 1.4)), fill = "none") +
469   xlab("Time (years)") + ylab("Survival without type 2 diabetes") +
470   labs(color = "Relative\nabundance\nrange") +
471   facet_wrap(~ Predictor)
472 ggsave("microbiome_predicts_incident_T2D/2y_exclusion_analysis/KP_plot.svg", plot=p,
units="cm", width=30, height=20)
473
474 #Plot distributions of the quartiles (for inlays in the KP-plot)
475 quartile_data <- lapply(kp_data[ncbi_cox_results_west$Predictor[which(
ncbi_cox_results_west$P.value < 0.05)]],
476   function(x) data.frame(x_value = density(x)$x,
477     y_value = density(x)$y,
478     quartile = factor(paste0("Q", findInterval(density(x)$x,
      quantile(x, prob=c(0, 0.25, 0.5, 0.75, 1)), all.inside=T))))))
479 quartile_data <- data.frame(rbindlist(quartile_data, idcol="Predictor"))
480 quartile_data$Predictor <- recode(quartile_data$Predictor, 'sp2673' = "[Clostridium]
citroniae", 'sp2671' = "[Clostridium] bolteae", 'sp2697' = "Tyzzerella nexilis",
'sp2638' = "[Ruminococcus] gnavus")
481 quartile_data$Predictor <- gsub("_", " ", quartile_data$Predictor)
482 quartile_data$Predictor <- factor(quartile_data$Predictor, levels = kp_predictors)
483
484 p <- ggplot(quartile_data, aes(x_value, y_value)) +

```

```

485     geom_line() +
486     geom_ribbon(aes(ymin=0, ymax=y_value, fill=quartile)) +
487     scale_fill_viridis(labels = c("Q1", "Q2", "Q3", "Q4"), discrete=T) +
488     guides(fill = "none") +
489     theme(axis.title = element_blank()) +
490     facet_wrap(~ Predictor)
491 ggsave("microbiome_predicts_incident_T2D/2y_exclusion_analysis/KP_plot_quartiles.svg",
492        plot=p, units="cm", width=30, height=20)
493
494 #Correlations and clustering between the associated taxa in west data
495 otu_table_assoc_taxa_west <- as.data.frame(otu_table(prune_taxa(ncbi_cox_west$
496 neat_results$Predictor, ncbi_data_raw_west)))
497 rownames(otu_table_assoc_taxa_west) <- ncbi_cox_results_west$Species[match(rownames(
498 otu_table_assoc_taxa_west), ncbi_cox_results_west$Predictor)]
499 set.seed(11235)
500 proprmatrix_west <- propr(t(otu_table_assoc_taxa_west), metric = "rho", p = 100)
501 clusters_assoc_west <- hclust(dist(proprmatrix_west@matrix), method = "ward.D2")
502 #Compute the Kelley-Gardner-Sutcliffe penalty function for a hierarchical cluster tree,
503 to determine optimal number of clusters
504 op_k_west <- kgs(clusters_assoc_west, dist(proprmatrix_west@matrix), maxclus = 20)
505 op_k_west <- as.numeric(names(op_k_west[which(op_k_west == min(op_k_west))]))
506 cluster_ids_west <- cutree(tree = clusters_assoc_west, k = op_k_west)
507 svg("microbiome_predicts_incident_T2D/2y_exclusion_analysis/clusters_west.svg", width=10
508 , height=10)
509 plot(clusters_assoc_west)
510 rect.hclust(clusters_assoc_west, k = op_k_west, border = 2:7)
511 dev.off()
512
513 #plot heatmap of taxa associations, clustering, and hazard ratios in the west data
514 newnames_west <- lapply(rownames(proprmatrix_west@matrix), function(x) bquote(italic(. (x
515 )))
516
517 #clusters are identical in membership of taxa in the same cluster, so we can just copy
518 the cluster annotation from east data to west data to keep cluster colors and naming
519 consistent
520 heatmap_annotation_west <- heatmap_annotation
521 #get correct hazard ratios for west data
522 heatmap_annotation_west$HR <- gsub("[0-9]\\.[0-9]*[[:space:]]*", "\\1",
523 ncbi_cox_results_west$HR[match(heatmap_annotation_west $Predictor, ncbi_cox_results_west
524 $Predictor)])
525 heatmap_annotation_west$HR <- round(as.numeric(as.character(heatmap_annotation_west $HR
526 )), 1)
527 heatmap_annotation_west$HR <- factor(heatmap_annotation_west $HR, levels = rev(seq(0.8,
528 1.2, 0.1)))
529
530 svg("microbiome_predicts_incident_T2D/2y_exclusion_analysis/correlations_west.svg",
531     width=15, height=15)
532 heatmap(proprmatrix_west@matrix, labels_row = as.expression(newnames_west), labels_col
533 = as.expression(newnames_west), annotation_row = heatmap_annotation_west[4],
534 treeheight_row = 0, annotation_col = heatmap_annotation_west[2], annotation_colors =
535 ann_colors, cutree_rows = op_k_west, cutree_cols = op_k_west, clustering_method =
536 "ward.D2", color = heatmap_colors, breaks = seq(-1, 1, length.out = 11), legend_breaks =
537 seq(-1, 1, length.out = 11), cellwidth=10, cellheight=10)
538 dev.off()
539
540 save.image("microbiome_predicts_incident_T2D/2y_exclusion_analysis/Analysis.RData")

```
