# Supplementary material
Source: publisher figshare collection journal article supplement (https://diabetesjournals.figshare.com/articles/dataset/_/18092744)
Supplement: Supplementary file 2 [file 1]

## Supplementary information

for

### **Gut microbiome composition is predictive of incident type 2 diabetes in a population cohort of 5 572 Finnish adults**

Matti O. Ruuskanen, PhD<sup>1\*</sup>, Pande P. Erawijantari, DSc<sup>1\*</sup>, Aki S. Havulinna, DSc (tech.)<sup>2,3</sup>,  
Yang Liu, MSc<sup>4,5</sup>, Guillaume Méric, PhD<sup>4,6</sup>, Jaakko Tuomilehto, MD, PhD<sup>2,7,8</sup>, Michael Inouye,  
PhD<sup>4,9</sup>, Pekka Jousilahti, MD, PhD<sup>2</sup>, Veikko Salomaa, MD, PhD<sup>2</sup>, Mohit Jain, PhD<sup>10,11</sup>, Rob  
Knight, PhD<sup>12,13,14,15</sup>, Leo Lahti, PhD<sup>1†</sup>, Teemu J. Niiranen, MD, PhD<sup>2,16†</sup>

\*These authors contributed equally to this work

†These authors contributed equally to this work

<sup>1</sup>Department of Computing, University of Turku, Turku, Finland

<sup>2</sup>Department of Public Health and Welfare, Finnish Institute for Health and Welfare, Helsinki, Finland

<sup>3</sup>Institute for Molecular Medicine Finland, FIMM - HiLIFE, Helsinki, Finland

<sup>4</sup>Cambridge Baker Systems Genomics Initiative, Baker Heart and Diabetes Institute, Melbourne, Victoria, Australia

<sup>5</sup>Department of Clinical Pathology, Melbourne Medical School, The University of Melbourne, Melbourne, Victoria,  
Australia

<sup>6</sup>Department of Infectious Diseases, Central Clinical School, Monash University, Melbourne, Victoria, Australia

<sup>7</sup>Department of Public Health, University of Helsinki, Helsinki, Finland

<sup>8</sup>Saudi Diabetes Research Group, King Abdulaziz University, Jeddah, Saudi Arabia

<sup>9</sup>Department of Public Health and Primary Care, Cambridge University, Cambridge, United Kingdom

<sup>10</sup>Department of Medicine, University of California, San Diego, La Jolla, California, USA

<sup>11</sup>Department of Pharmacology, University of California, San Diego, La Jolla, California, USA

<sup>12</sup>Jacobs School of Engineering, University of California, San Diego, La Jolla, California, USA

<sup>13</sup>Center for Microbiome Innovation, University of California San Diego, La Jolla, California, USA

<sup>14</sup>Department of Pediatrics, School of Medicine, University of California San Diego, La Jolla, California, USA

<sup>15</sup>Department of Computer Science & Engineering, University of California San Diego, La Jolla, California, USA

<sup>16</sup>Division of Medicine, Turku University Hospital, Turku, Finland

**Table S1.** Results of multivariable adjusted Cox regression models for incident type 2 diabetes.

| Predictor                                 | Eastern Finland |                                |                    |                  | Western Finland |                                |               |
|-------------------------------------------|-----------------|--------------------------------|--------------------|------------------|-----------------|--------------------------------|---------------|
|                                           | Coefficient     | Hazard ratio                   | P-value            | Adjusted p-value | Coefficient     | Hazard ratio                   | P-value       |
| PC1                                       | -0.246          | 0.782<br>(95% CI, 0.693-0.883) | $1 \times 10^{-4}$ | 0.0099           | -0.067          | 0.935<br>(95% CI, 0.785-1.114) | 0.4542        |
| Cluster 1                                 | 0.182           | 1.2<br>(95% CI, 1.082-1.33)    | $5 \times 10^{-4}$ | -                | 0.168           | 1.183<br>(95% CI, 1.018-1.375) | <b>0.0284</b> |
| Cluster 2                                 | 0.123           | 1.13<br>(95% CI, 1.008-1.267)  | 0.0358             | -                | 0.062           | 1.064<br>(95% CI, 0.898-1.261) | 0.4742        |
| Cluster 3                                 | 0.211           | 1.235<br>(95% CI, 1.106-1.381) | $2 \times 10^{-4}$ | -                | 0.08            | 1.083<br>(95% CI, 0.917-1.278) | 0.3465        |
| Cluster 4                                 | 0.217           | 1.242<br>(95% CI, 1.115-1.384) | $1 \times 10^{-4}$ | -                | 0.099           | 1.104<br>(95% CI, 0.939-1.299) | 0.2306        |
| Cluster 5                                 | 0.19            | 1.209<br>(95% CI, 1.092-1.339) | $3 \times 10^{-4}$ | -                | 0.163           | 1.177<br>(95% CI, 1.016-1.364) | <b>0.0297</b> |
| <i>Blautia</i> sp. KLE 1732               | 0.198           | 1.219<br>(95% CI, 1.09-1.364)  | $5 \times 10^{-4}$ | 0.0153           | 0.123           | 1.13<br>(95% CI, 0.958-1.334)  | 0.1469        |
| <i>Clostridium phoceensis</i>             | 0.197           | 1.218<br>(95% CI, 1.09-1.361)  | $5 \times 10^{-4}$ | 0.0153           | 0.014           | 1.014<br>(95% CI, 0.858-1.198) | 0.8702        |
| <i>Coprococcus comes</i>                  | 0.194           | 1.214<br>(95% CI, 1.084-1.36)  | $8 \times 10^{-4}$ | 0.0153           | -0.044          | 0.957<br>(95% CI, 0.807-1.135) | 0.6148        |
| <i>[Clostridium] citroniae</i>            | 0.192           | 1.212<br>(95% CI, 1.086-1.352) | $6 \times 10^{-4}$ | 0.0153           | 0.192           | 1.212<br>(95% CI, 1.035-1.42)  | <b>0.0172</b> |
| <i>Eggerthella lenta</i>                  | 0.187           | 1.205<br>(95% CI, 1.08-1.344)  | $8 \times 10^{-4}$ | 0.0153           | 0.071           | 1.074<br>(95% CI, 0.909-1.269) | 0.4022        |
| <i>Blautia obeum</i>                      | 0.18            | 1.197<br>(95% CI, 1.071-1.338) | 0.0015             | 0.0221           | 0.112           | 1.118<br>(95% CI, 0.952-1.313) | 0.1747        |
| <i>[Clostridium] glycyrrhizinilyticum</i> | 0.176           | 1.193<br>(95% CI, 1.08-1.318)  | $5 \times 10^{-4}$ | 0.0153           | 0.103           | 1.108<br>(95% CI, 0.942-1.304) | 0.2163        |
| <i>Anaerostipes hadrus</i>                | 0.171           | 1.186<br>(95% CI, 1.061-1.327) | 0.0028             | 0.0279           | -0.065          | 0.937<br>(95% CI, 0.795-1.105) | 0.4416        |
| <i>[Clostridium] symbiosum</i>            | 0.169           | 1.184<br>(95% CI, 1.061-1.321) | 0.0025             | 0.0277           | 0.11            | 1.117<br>(95% CI, 0.949-1.314) | 0.1832        |
| <i>Bacteroides vulgatus</i>               | 0.166           | 1.18<br>(95% CI, 1.047-1.331)  | 0.0067             | 0.0461           | 0.121           | 1.128<br>(95% CI, 0.945-1.347) | 0.1821        |
| <i>Oscillibacter</i> sp. KLE 1745         | 0.165           | 1.179<br>(95% CI, 1.054-1.319) | 0.0039             | 0.0325           | 0.091           | 1.096<br>(95% CI, 0.926-1.296) | 0.2875        |
| <i>[Clostridium] boltea</i>               | 0.164           | 1.178<br>(95% CI, 1.068-1.3)   | 0.0011             | 0.0172           | 0.185           | 1.204<br>(95% CI, 1.043-1.39)  | <b>0.0115</b> |
| <i>[Ruminococcus] gnavus</i>              | 0.162           | 1.176<br>(95% CI, 1.06-1.304)  | 0.0023             | 0.0277           | 0.155           | 1.168<br>(95% CI, 1.006-1.355) | <b>0.0414</b> |
| <i>Eubacterium ramulus</i>                | 0.157           | 1.17<br>(95% CI, 1.048-1.306)  | 0.0053             | 0.0389           | 0.042           | 1.043<br>(95% CI, 0.885-1.229) | 0.6161        |
| <i>Tyzzerella nexilis</i>                 | 0.15            | 1.162<br>(95% CI, 1.046-1.292) | 0.0052             | 0.0389           | 0.158           | 1.171<br>(95% CI, 1.011-1.355) | <b>0.0347</b> |
| <i>Alistipes putredinis</i>               | -0.159          | 0.853<br>(95% CI, 0.767-0.949) | 0.0035             | 0.0325           | -0.054          | 0.948<br>(95% CI, 0.805-1.116) | 0.5192        |
| <i>Sutterella wadsworthensis</i>          | -0.17           | 0.844<br>(95% CI, 0.752-0.947) | 0.004              | 0.0325           | -0.023          | 0.977<br>(95% CI, 0.823-1.16)  | 0.7939        |
| <i>Alistipes indistinctus</i>             | -0.177          | 0.838<br>(95% CI, 0.747-0.94)  | 0.0025             | 0.0277           | 0.023           | 1.023<br>(95% CI, 0.862-1.213) | 0.7961        |

- Significant p-values ( $< 0.05$ ) for models using data from Western Finland are indicated in bold font.

**Table S2.** Results of multivariable adjusted Cox regression models for incident type 2 diabetes after excluding participants diagnosed with type 2 diabetes in the first two years of the follow-up period.

| Predictor                                 | Eastern Finland |                                |                    |                  | Western Finland |                                |               |
|-------------------------------------------|-----------------|--------------------------------|--------------------|------------------|-----------------|--------------------------------|---------------|
|                                           | Coefficient     | Hazard ratio                   | P-value            | Adjusted p-value | Coefficient     | Hazard ratio                   | P-value       |
| PC1                                       | 0.258           | 1.295<br>(95% CI, 1.144-1.465) | 0                  | 0.0058           | -0.065          | 0.937<br>(95% CI, 0.786-1.118) | 0.4717        |
| Cluster 1                                 | 0.183           | 1.201<br>(95% CI, 1.082-1.334) | $6 \times 10^{-4}$ | NA               | 0.172           | 1.188<br>(95% CI, 1.023-1.38)  | <b>0.0241</b> |
| Cluster 2                                 | 0.212           | 1.237<br>(95% CI, 1.102-1.387) | $3 \times 10^{-4}$ | NA               | 0.092           | 1.097<br>(95% CI, 0.924-1.301) | 0.2897        |
| Cluster 3                                 | -0.212          | 0.809<br>(95% CI, 0.727-0.9)   | $1 \times 10^{-4}$ | NA               | -0.126          | 0.881<br>(95% CI, 0.753-1.031) | 0.1152        |
| Cluster 4                                 | 0.249           | 1.283<br>(95% CI, 1.145-1.439) | 0                  | NA               | 0.011           | 1.011<br>(95% CI, 0.851-1.202) | 0.898         |
| Cluster 5                                 | 0.208           | 1.232<br>(95% CI, 1.103-1.375) | $2 \times 10^{-4}$ | NA               | 0.123           | 1.131<br>(95% CI, 0.963-1.328) | 0.1336        |
| Cluster 6                                 | 0.197           | 1.218<br>(95% CI, 1.098-1.351) | $2 \times 10^{-4}$ | NA               | 0.166           | 1.181<br>(95% CI, 1.019-1.368) | <b>0.0272</b> |
| <i>Blautia sp. KLE 1732</i>               | 0.213           | 1.238<br>(95% CI, 1.105-1.386) | $2 \times 10^{-4}$ | 0.0128           | 0.134           | 1.144<br>(95% CI, 0.969-1.35)  | 0.1124        |
| <i>Coprococcus comes</i>                  | 0.211           | 1.235<br>(95% CI, 1.101-1.386) | $3 \times 10^{-4}$ | 0.0128           | -0.03           | 0.971<br>(95% CI, 0.817-1.152) | 0.7324        |
| <i>Clostridium phoceensis</i>             | 0.198           | 1.219<br>(95% CI, 1.089-1.365) | $6 \times 10^{-4}$ | 0.0128           | 0.008           | 1.008<br>(95% CI, 0.853-1.192) | 0.9238        |
| <i>[Clostridium] citroniae</i>            | 0.196           | 1.217<br>(95% CI, 1.089-1.36)  | $5 \times 10^{-4}$ | 0.0128           | 0.197           | 1.218<br>(95% CI, 1.039-1.427) | <b>0.015</b>  |
| <i>Blautia obeum</i>                      | 0.192           | 1.211<br>(95% CI, 1.083-1.356) | $8 \times 10^{-4}$ | 0.0146           | 0.124           | 1.132<br>(95% CI, 0.963-1.33)  | 0.1323        |
| <i>[Clostridium] glycyrrhizinilyticum</i> | 0.18            | 1.197<br>(95% CI, 1.082-1.325) | $5 \times 10^{-4}$ | 0.0128           | 0.112           | 1.118<br>(95% CI, 0.951-1.315) | 0.1775        |
| <i>Eubacterium ramulus</i>                | 0.18            | 1.198<br>(95% CI, 1.072-1.339) | 0.0015             | 0.0178           | 0.057           | 1.059<br>(95% CI, 0.899-1.248) | 0.4919        |
| <i>Eggerthella lenta</i>                  | 0.18            | 1.197<br>(95% CI, 1.071-1.338) | 0.0015             | 0.0178           | 0.078           | 1.081<br>(95% CI, 0.915-1.278) | 0.3596        |
| <i>Roseburia intestinalis</i>             | 0.177           | 1.193<br>(95% CI, 1.063-1.34)  | 0.0028             | 0.0239           | -0.035          | 0.965<br>(95% CI, 0.813-1.147) | 0.6885        |
| <i>Anaerostipes hadrus</i>                | 0.173           | 1.189<br>(95% CI, 1.061-1.332) | 0.0029             | 0.0239           | -0.057          | 0.945<br>(95% CI, 0.8-1.115)   | 0.4997        |
| <i>[Clostridium] symbiosum</i>            | 0.171           | 1.187<br>(95% CI, 1.062-1.326) | 0.0024             | 0.0238           | 0.119           | 1.127<br>(95% CI, 0.958-1.325) | 0.1489        |
| <i>Bacteroides vulgatus</i>               | 0.171           | 1.187<br>(95% CI, 1.05-1.341)  | 0.0059             | 0.0389           | 0.112           | 1.118<br>(95% CI, 0.936-1.335) | 0.2172        |
| <i>[Ruminococcus] gnavus</i>              | 0.166           | 1.181<br>(95% CI, 1.063-1.312) | 0.002              | 0.0213           | 0.161           | 1.175<br>(95% CI, 1.013-1.363) | <b>0.0327</b> |
| <i>Tyzzerella nexilis</i>                 | 0.164           | 1.178<br>(95% CI, 1.059-1.31)  | 0.0025             | 0.0238           | 0.163           | 1.177<br>(95% CI, 1.018-1.361) | <b>0.0281</b> |
| <i>[Clostridium] bolteae</i>              | 0.162           | 1.176<br>(95% CI, 1.064-1.299) | 0.0014             | 0.0178           | 0.187           | 1.206<br>(95% CI, 1.044-1.392) | <b>0.0108</b> |
| <i>Dorea sp. 5-2</i>                      | 0.16            | 1.173<br>(95% CI, 1.047-1.315) | 0.0061             | 0.0389           | 0.043           | 1.044<br>(95% CI, 0.881-1.237) | 0.6181        |
| <i>Alistipes putredinis</i>               | -0.155          | 0.856<br>(95% CI, 0.768-0.954) | 0.005              | 0.0367           | -0.063          | 0.939<br>(95% CI, 0.798-1.106) | 0.4512        |
| <i>Sutterella wadsworthensis</i>          | -0.16           | 0.852<br>(95% CI, 0.758-0.959) | 0.0077             | 0.0458           | -0.014          | 0.986<br>(95% CI, 0.83-1.171)  | 0.872         |

- Significant p-values (< 0.05) for models using data from Western Finland are indicated in bold font.

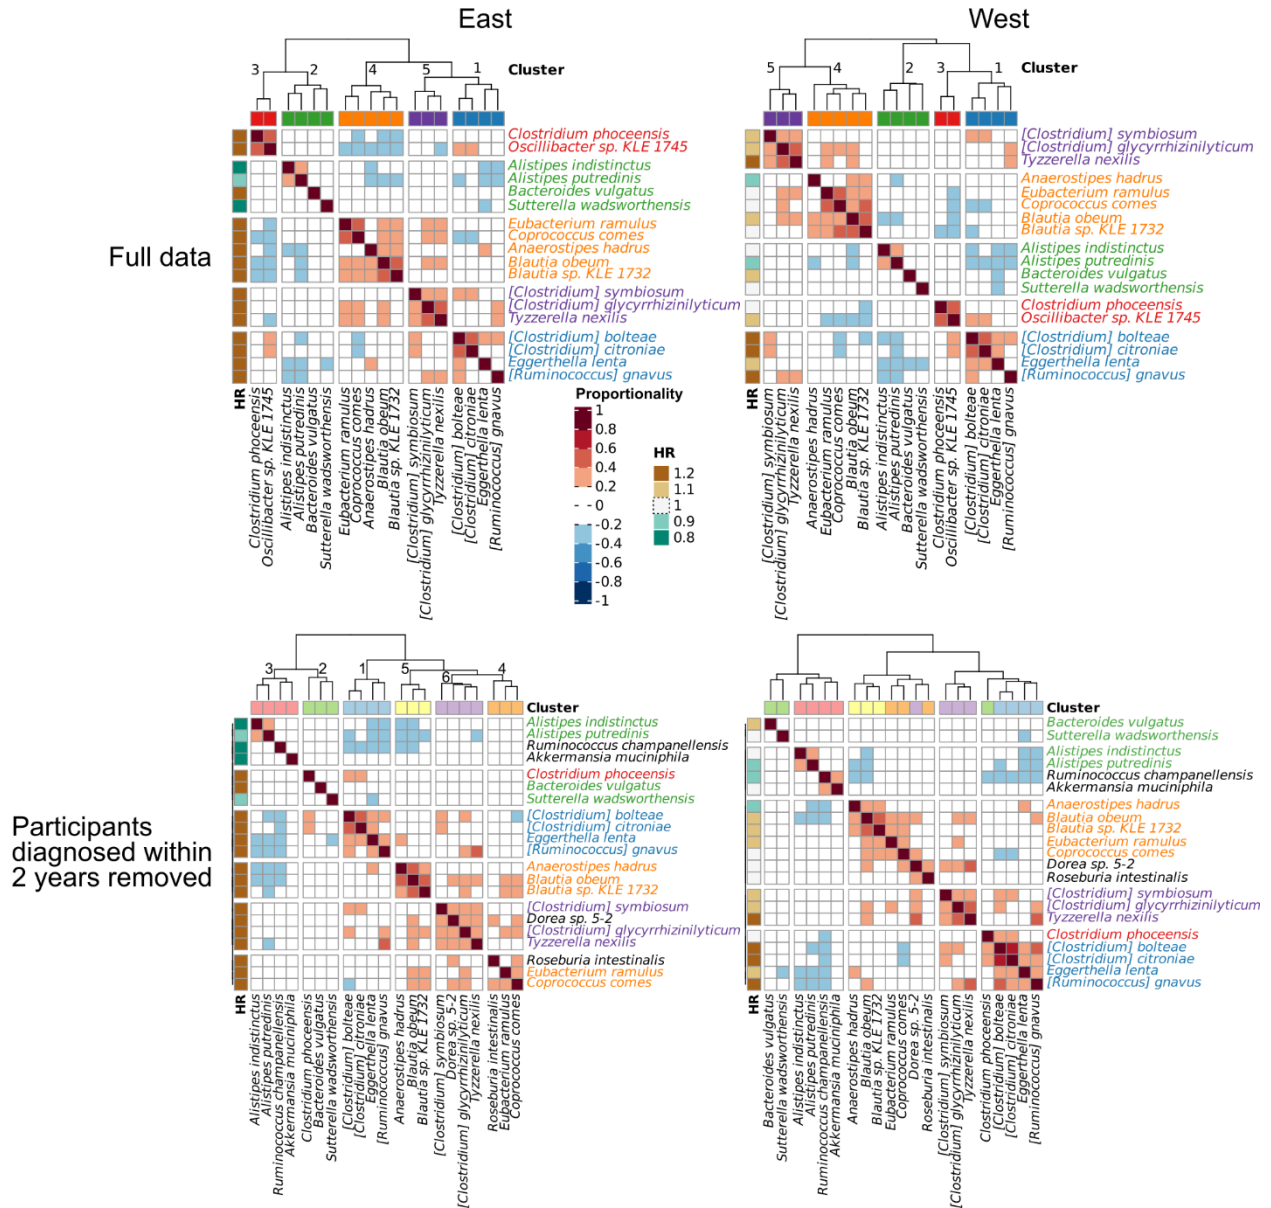

**Figure S1.** Effect of excluding participants diagnosed with type 2 diabetes in the first two years of the follow-up period on taxa filtering, proportional abundance, and clustering. The 21 taxa in the lower panels are annotated both with the five clusters of the full data (taxa names colors), and a new clustering conducted separately in the subset Eastern Finland data (color bar on top of the heatmaps on the lower row panels). The two annotations can also be identified by their different color schemes.

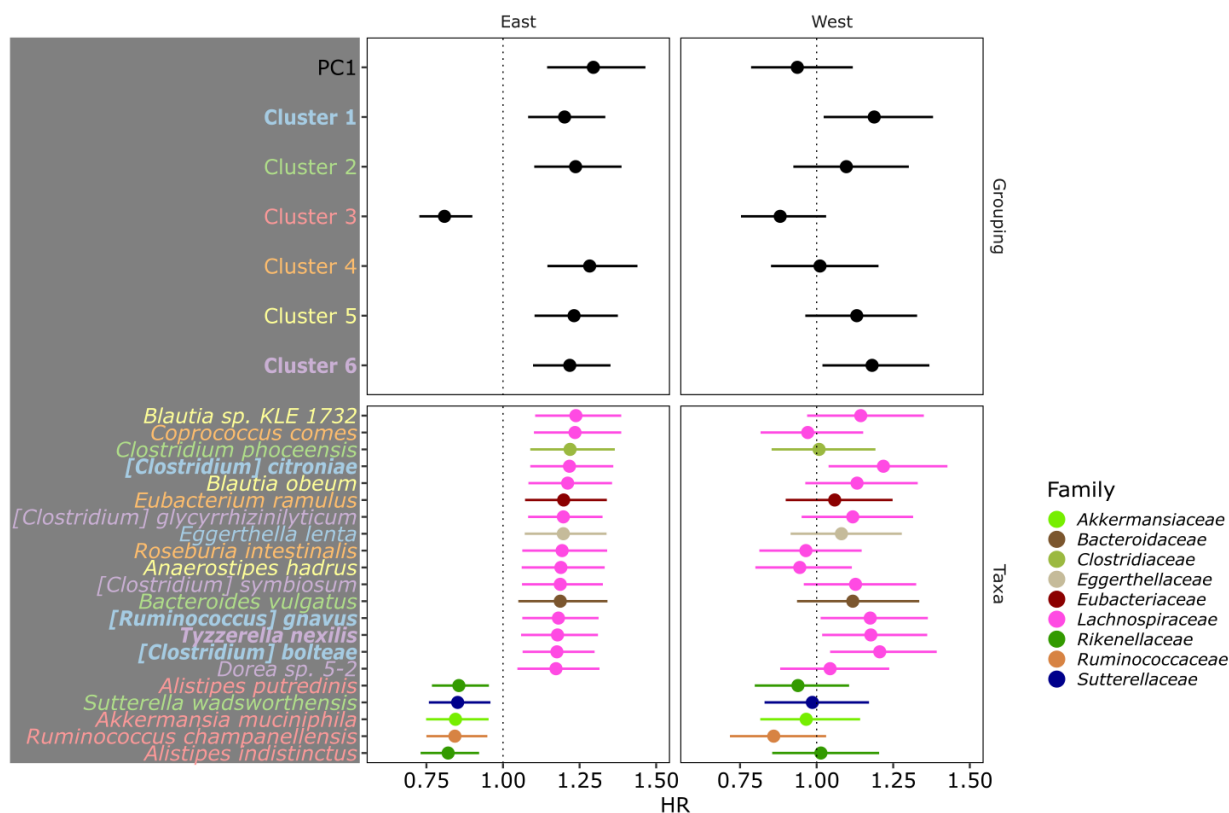

**Figure S2.** Hazard ratios between models in Eastern and Western Finland data after excluding participants diagnosed with type 2 diabetes in the first two years of the follow-up period.

Features with significant associations in the validation (Western Finland) data are indicated in bold and the taxa colors show their membership in a cluster. The information in this figure can be found in numeric format in **Table S2**.

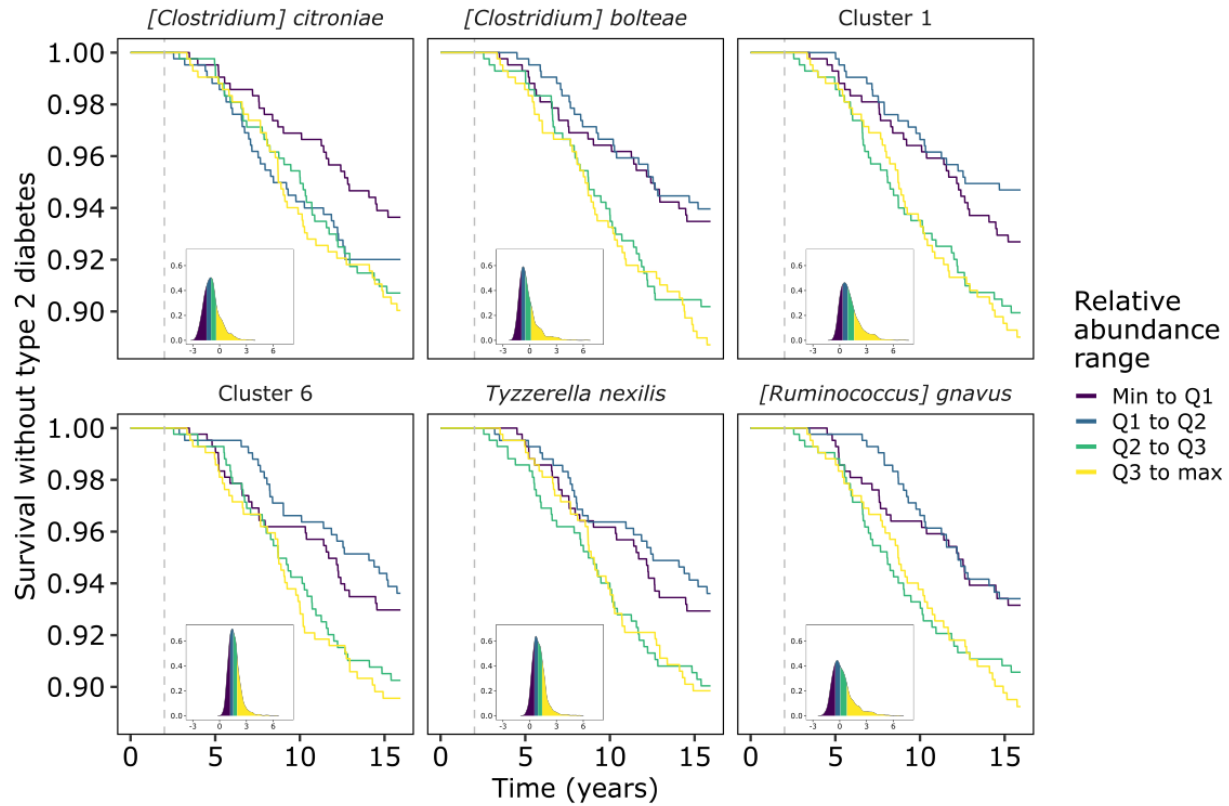

**Figure S3.** Kaplan-Meier curves for features with significant effect sizes in both data sets after excluding participants diagnosed with type 2 diabetes in the first two years of the follow-up. Diabetes-free survival times of participants in Western Finland is shown. Curves are separated by ranges between quartiles of relative abundance of each feature. Distribution of the participants with the same relative abundance ranges are included as inlays for each of the features. The cut-off for the removal of participants diagnosed in the first two years of the follow-up period is indicated with a dashed gray line.
